# Supplementary material
Source: Elsevier journal article supplement (https://www.sciencedirect.com/science/article/pii/S0048712020301134)
Supplement: mmc1 [file S0048712020301134:mmc1.pdf]

## Cuestionario de evocación mental de imágenes, movimientos y actividades (CEMIMA).

**Autor: Miguel Gómez Martínez.**

### Instrucciones:

- ✓ La valoración debe hacerse en un lugar tranquilo, donde el paciente pueda concentrarse y no tenga elementos sonoros distractores.
- ✓ El paciente realizará las actividades de evocación sentado, cómodo, y con los ojos cerrados. En caso de dificultad para mantener los ojos cerrados se le pueden vendar los ojos.
- ✓ El paciente debe verse la mano afecta durante el desarrollo de la actividad

### Puntuación:

El cuestionario tiene tres tipos de puntuaciones, dos positivas y una negativa:

1. POSITIVA.
  - a. Puntuación de EVOCACIÓN: Puntúe de 0 a 10 lo nítido, claro, bien (o algún adjetivo similar) que ha observado su mano
  - b. Puntuación de SENSACIÓN (Cinestesia): Puntúe de 0 a 10 lo bien (o algún adjetivo similar) que ha sentido su mano y el movimiento de la misma (como sientes el movimiento, como percibes la sensación del movimiento).
2. NEGATIVA.
 

Por cada una de las interferencias detectadas o explicadas por el paciente se da un punto negativo.

### 1º PASO

Cierre los ojos, e imagínese una de sus manos, registre la mano imaginada:

|                |                   |                      |
|----------------|-------------------|----------------------|
| Mano derecha   | Mano dominante    | Mano afecta          |
| Mano izquierda | Mano no dominante | Mano menos afecta    |
|                |                   | Sin afectación       |
|                |                   | Afectación bilateral |

### 2º PASO

Cierre los ojos e imagínese la mano Izquierda/Derecha (mano afecta). Quiero que se imagine sólo esa mano, nada más. Debe fijarse en los detalles de la misma. Su contorno, la palma, el dorso, los dedos, los pliegues, las líneas, las uñas... (Las instrucciones deben darse con tranquilidad, claridad y poco a poco. El proceso de evocación puede durar varios minutos, no más de 3.

*En el caso de que no haya afectación o que la afectación sea bilateral en igualdad, se debe evocar la mano dominante.*

2.1 Puntúe de 0 a 10 lo nítido, claro, bien (o algún adjetivo similar) que ha observado su mano

Puntuación de EVOCACIÓN:

2.2 ¿Ha tenido alguna dificultad?

- ✓ Le ha costado mucho imaginarse la mano.
- ✓ No se imaginan la mano con detalles.
- ✓ Se ha imaginado la otra mano.
- ✓ No se ha imaginado la mano nítida.
- ✓ Se ha imaginado la mano de otra persona.
- ✓ Ha evocado algún síntoma en su proceso mental como dolor, temblor...
- ✓ Fisiológicamente apareció algún síntoma o aumentó.
- ✓ Otros: \_\_\_\_\_

Por cada una de las interferencias detectadas o explicadas por el paciente se da un punto negativo.

PUNTUACIÓN NEGATIVA:

### 3º PASO

Cierre los ojos e imagínese la mano Izquierda/Derecha (mano afecta). Quiero que se imagine sólo esa mano, nada más. Debe fijarse bien en los detalles. Ahora quiero que vea como la mano se abre y se cierra. El proceso mental debe repetirse diez veces. El proceso de evocación puede durar varios minutos, no más de 3.

3.1 ¿Podría hacer con la otra mano el movimiento que se imaginó?

*En caso de ver que el movimiento no es el adecuado se le da un punto negativo*

3.2 Puntúe de 0 a 10 lo nítido, claro, bien (o algún adjetivo similar) que ha observado su mano.

Puntuación de EVOCACIÓN:

3.3 Puntúe de 0 a 10 lo bien (o algún adjetivo similar) que ha sentido su mano y el movimiento de la misma (como sientes el movimiento, como percibes la sensación del movimiento).

Puntuación de SENSACIÓN:

3.4 ¿Ha tenido alguna dificultad?

- ✓ Se ha imaginado la otra mano
- ✓ No se ha imaginado la mano nítida
- ✓ Se ha imaginado la mano de otra persona
- ✓ No era capaz de realizar el movimiento
- ✓ Le ha costado mucho imaginarse la mano
- ✓ No se imaginan la mano con detalles
- ✓ Los movimientos han sido lentos
- ✓ Los movimientos han sido imprecisos
- ✓ El movimiento que se ha imaginado era anómalo.
- ✓ Ha evocado algún síntoma en su proceso mental como dolor, temblor...
- ✓ Fisiológicamente apareció algún síntoma o aumentó
- ✓ Abre la mano, pero no la cierra, o cierra la mano, pero no la abre
- ✓ Otros: \_\_\_\_\_

Por cada una de las interferencias detectadas o explicadas por el paciente se da un punto negativo.

PUNTUACIÓN NEGATIVA:

#### 4º PASO

Cierre los ojos e imagínese la mano Izquierda/Derecha (mano afecta). Quiero que se imagine sólo esa mano, nada más. Debe fijarse bien en los detalles. Ahora quiero que se imagine una pelota pequeña, como si fuera de tenis o similar, la puede coger con una sola mano. Ahora quiero que tire esa pelota hacia arriba y la coja. El proceso mental debe repetirse diez veces. El proceso de evocación puede durar varios minutos, no más de 3.

4.1 ¿Podría hacer con la otra mano el movimiento que se imaginó?

*En caso de ver que el movimiento no es el adecuado se le da un punto negativo*

4.2 Puntúe de 0 a 10 lo nítido, claro, bien (o algún adjetivo similar) que ha observado su mano

Puntuación de EVOCACIÓN:

4.3 Puntúe de 0 a 10 lo bien (o algún adjetivo similar) que ha sentido su mano, el movimiento de la misma (como sientes el movimiento, como percibes la sensación del movimiento) y el peso y textura de la pelota

Puntuación de SENSACIÓN (Cinestesia):

4.4 ¿Ha tenido alguna dificultad?

- ✓ Se ha imaginado la otra mano
- ✓ No se ha imaginado la mano nítida
- ✓ Se ha imaginado la mano de otra persona
- ✓ No era capaz de realizar el movimiento
- ✓ El movimiento que se ha imaginado era anómalo.
- ✓ Le ha costado mucho imaginarse la mano
- ✓ No se imaginan la mano con detalles
- ✓ Los movimientos han sido lentos
- ✓ Los movimientos han sido imprecisos
- ✓ La pelota se ha caído
- ✓ No se ha podido realizar la actividad
- ✓ Ha evocado algún síntoma en su proceso mental como dolor, temblor, PINCHAZO...
- ✓ Fisiológicamente apareció algún síntoma o aumentó
- ✓ Otros: \_\_\_\_\_

Por cada una de las interferencias detectadas o explicadas por el paciente se da un punto negativo.

PUNTUACIÓN NEGATIVA:

## 5º PASO

Cierre los ojos e imagínese sus dos manos. Debe fijarse bien en los detalles de las dos manos. Ahora quiero que se imagine en una mesa, frente a una taza y una cucharilla. En el lado Izquierdo/Derecho (Mano afecta) tiene un sobre con azúcar o sacarina. Quiero que mentalmente coja el sobre, lo abra y lo vierta dentro de la taza. Una vez completada esta tarea quiero que remueva la bebida. El proceso de evocación puede durar varios minutos, no más de 3.

5.1 Puntúe de 0 a 10 lo nítido, claro, bien (o algún adjetivo similar) que ha observado su mano  
Puntuación de EVOCACIÓN:

5.2 Puntúe de 0 a 10 lo bien (o algún adjetivo similar) que ha sentido su mano, el movimiento de la misma (como sientes el movimiento, como percibes la sensación del movimiento) y el peso y textura de los objetos manipulados.

Puntuación de SENSACIÓN (Cinestesia):

5.3 ¿Ha tenido alguna dificultad?

- ✓ No se ha imaginado la mano nítida.
- ✓ Se ha imaginado la mano de otra persona.
- ✓ No era capaz de realizar el movimiento.
- ✓ El movimiento que se ha imaginado era anómalo.
- ✓ Los elementos se han caído.
- ✓ No realiza la actividad bimanual.
- ✓ No es capaz de realizar la actividad.
- ✓ Ha evocado algún síntoma en su proceso mental como dolor, temblor...
- ✓ Fisiológicamente apareció algún síntoma o aumentó.
- ✓ Otros: \_\_\_\_\_

Por cada una de las interferencias detectadas o explicadas por el paciente se da un punto negativo.

PUNTUACIÓN NEGATIVA:
